# Supplementary material for: Fris Verder: een verkennend onderzoek naar groepsbehandelingen voor ouderen met alcoholproblemen
Source: Springer Nature journal article supplement (doi:10.1007/s12508-022-00343-0), 2022-05-01
Supplement: MOESM1 [file 20390734]

**Bijlage – Topiclijst [[1]](#footnote-1)**

**Inleiding en achtergrond**

De landelijke werkgroep alcohol en ouderen heeft de wens geuit om te komen tot een standaardisatie van een groepsgericht aanbod voor 55-plussers met alcoholproblemen. De vragen die wij u stellen helpen ons bij de opzet van deze standaardisatie.

Allereerst hebben wij het door Parnassia/Brijder ontwikkelde Fris Verder programma als basis geanalyseerd en in deelthema’s opgesplitst. Hier hebben wij meerdere bestaande programma’s gericht op 55-plussers met alcoholproblemen naast gehouden om verschillen en overeenkomsten in de diverse deelthema’s te kunnen identificeren. Dit hebben wij ook voor uw programma gedaan en de belangrijkste verschillen hebben we u al voorgelegd. In dit interview willen we hier per deelthema graag op doorvragen. We zijn met name geïnteresseerd in uw motivatie voor keuzes in uw programma. Daarnaast hebben wij nog een aantal aanvullende verdiepende vragen voor u.

U heeft als het goed is via email een document ontvangen waar ik u verdiepende vragen over ga stellen. Zou u dit willen openen nu? Het telefonisch interview zal ongeveer een uur duren. De gegevens die we van u verzamelen worden gepseudononimiseerd. Dat wil zeggen dat niemand zal weten dat u het bent die deze antwoorden geeft. Ook hoeft u vragen niet te beantwoorden als u dat niet wilt en kunt u altijd stoppen.

Verder zou ik dit telefoongesprek ook graag op audio willen opnemen. Dan kunnen wij goed naar u luisteren en later alles uitwerken. Uw antwoorden op de audio worden opgeslagen in een veilige omgeving (waar alleen de direct betrokken onderzoekers bij kunnen) zo lang als het onderzoek duurt.

Is tot zover alles duidelijk voor u? Dan start ik nu de audio opname en kan het interview beginnen.

*Positionering Fris Verder*

1) Waar zou u Fris Verder plaatsen in deze zorgstandaard?

- Kunt u dat toelichten?

2) Hoe verlopen verwijzingen van deelnemers?

- Waar komen deelnemers vandaan?

*Doelstellingen*

1) Wat zijn de doelstellingen van uw programma?

2) Wat zijn volgens u haalbare uitgangspunten? Is dit abstinentie, of hanteerbaarheid?

3) Als er een landelijk protocol Fris Verder komt, moet dat zich dan beperkten tot alcohol (met eventuele uitstapjes naar benzodiazepines)? Of moet ook ander middelengebruik meegenomen worden hierin?

4) Waarom wordt uw programma in groepen gegeven? Waarom niet individueel (zoals bij sommige CGT)?

*Voorbereiding/verwijzing programma*

1) Wie doet de inschatting of mensen geschikt zijn voor het programma?

- Waarom deze persoon/personen?

- Hoe verloopt deze inschatting?

2) Is er een intake voor het programma?

- Hoe verloopt deze intake?

- Is er een voorgesprek, of een eerste individuele behandelsessie?

- Heeft dit meerwaarde? Zo ja, waarom, zo nee, waarom niet?

- Hoe en waar wordt deze gedaan?

- En waar wordt op gelet?

- En welke screenings/onderzoeken worden uitgevoerd?

- Wordt er gekeken naar groepsgeschiktheid

- Wordt er gekeken naar cognitieve vermogens?

- Mag een naasten aanwezig zijn?

*Programmaduur*

1) Waar is het aantal bijeenkomsten voor uw programma op gebaseerd?

2) Wordt uitloop toegestaan?

- Wanneer komt dit voor en waarom is dit?

- Hoe wordt dit opgevangen?

3) Worden sommige sessies vaker gegeven (herhaling)?

- Wanneer komt dit voor en waarom is dit?

4) Worden sommige sessies gespreid over meerdere bijeenkomsten?

- Wanneer komt dit voor en waarom is dit?

5) Waarom worden er meerdere bijeenkomsten in 1 week uitgevoerd (wanneer van toepassing)?

- Waar zijn deze keuzes op gebaseerd?

*Kenmerken/criteria groep*

1) Kunt u een omschrijving geven van Fris Verder deelnemers?

- In welke fase van de problematiek zitten zij meestal?

2) Welke eigenschappen heeft de potentiele Fris Verder deelnemer volgens u?

3) Zijn er ook contra-indicaties?

4) Heeft u ervaring met ouderen die schaamte ervaren m.b.t. hun problematiek?

- Heeft dit invloed op de groepsdynamiek?

5) Wanneer is iemand klaar met Fris Verder?

- Wie maakt deze inschatting/besluit?

- Waarom deze persoon?

6) Is tussentijdse instroom mogelijk in uw programma?

- Waarom wel/niet?

7) Hoeveel deelnemers staat u toe?

- Waarom dit aantal?

*Inhoud van het programma (afhankelijk van documenten gestuurd door respondent)*

1) Welke bijeenkomsten worden gehouden en wat wordt daarin gedaan?

2) Kunt u redenen formuleren voor het afwijken van de individuele CGT / Fris Verder basis? –

- Waarom is er afgeweken?

3) Hoe heeft u uw programma ontwikkeld?

- Welke documenten zijn gebruikt?

4) Hoe gaat u om met terugvalgedrag?

5) Heeft u tussenevaluaties ingericht?

6) Worden mensen geholpen bij het maken van huiswerk (wanneer van toepassing)?

7) Worden trainingen ook thuis aangeboden?

8) Zijn naasten welkom tijdens bijeenkomsten?

9) Wordt er ook lunch geregeld?

10) Hoe gaat u om met roken?

- Zijn rookpauzes ingelast?

11) Hoe gaat u om met alcoholgebruik voor en tijdens bijeenkomsten?

- Moeten mensen vooraf een blaastest doen?

12) Wat is volgens u groep-verstorend gedrag (wanneer van toepassing)?

- Hoe gaat u daarmee om?

13) Hoe krijgen mensen buiten het dagprogramma ondersteuning (wanneer nodig)?

14) Wie is klinisch eindverantwoordelijke voor de deelnemer?

15) Is er ruimte voor vrije invulling van bijeenkomsten?

16) Wat zijn consequenties bij afwezigheid (wanneer van toepassing)?

- Hoe vaak mogen mensen bijeenkomsten missen?

- Wat zijn gevolgen?

17) Waarom heeft u dramatherapie (of de dramadriehoek) toegevoegd aan het programma (wanneer van toepassing)?

- Wat is hiervan de achterliggende reden?

18) Wordt zelfcontrole/trek (craving) ‘live’ geoefend met de deelnemers?

19) Hoe motiveert u ouderen tot gedragsverandering als de mogelijkheden beperkt zijn (bijvoorbeeld inhaken op zingeving)?

*Info over deelnemers en begeleiders*

1) Welke thema’s zijn volgens u met name geschikt om te bespreken met ouderen?

- Wat zijn thema’s die in de groep goed werken?

- En hoe brengt u die ter sprake?

2) In welke mate speelt leeftijd een rol in de benadering die u kiest?

- Speelt leeftijd een rol in de keuze voor fysieke elementen in uw behandeling (bijvoorbeeld in de ochtend sporten, in de middag gesprekken)?

- Hoe gaat u om met groepsdynamiek binnen deze doelgroep?

3) Welke trainers/begeleiders zouden volgens u het programma moeten draaien?

- Welke kwalificaties zijn volgens u minimaal vereist?

- Welke ervaring moet iemand hebben?

4) Wordt EMDR (of andere therapie) door u aanbevolen bij verwijzingen?

- Wordt dit ook in de groep besproken, of wordt dit individueel aangeboden?

- Waarom doet u dat zo?

5) Maakt u gebruik van ervaringsdeskundigen?

- Waarom wel/waarom niet?

*Oplevering van het protocol*

1) Als wij het protocol of standaardprogramma gereed hebben, in hoeverre bent u bereidt tot het maken van aanpassingen aan uw eigen programma?

2) Hoeveel behoefte is er voor een standaard-protocol?

Afsluiting interview

- Heeft u hier verder nog wat aan toe te voegen?

- Heeft u verder nog vragen?

- Bedankt voor uw tijd en inzichten!

1. Deze bijlage behoort bij het artikel Roodbeen R, Mheen D van de, Bovens R. Fris Verder: een verkennend onderzoek naar groepsbehandelingen voor ouderenmet alcoholproblemen. TSG Tijdschr Gezondheidswet. DOI 10.1007/s12508-022-00343-0. [↑](#footnote-ref-1)
